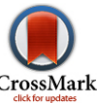

## Correction

# Correction: Pollen and Phytolith Evidence for Rice Cultivation and Vegetation Change during the Mid-Late Holocene at the Jiangli Site, Suzhou, East China

The *PLOS ONE* Staff

## Notice of Republication

This article was republished on April 21, 2014, to correct errors in number symbols that were introduced during the typesetting process. Please download this article again to view the correct version. The originally published, uncorrected article and the republished, corrected article are provided here for reference.

## Supporting Information

**File S1.** Originally published, uncorrected article.  
(PDF)

**File S2.** Republished corrected article.  
(PDF)

## Reference

1. Qiu Z, Jiang H, Ding J, Hu Y, Shang X (2014) Pollen and Phytolith Evidence for Rice Cultivation and Vegetation Change during the Mid-Late Holocene at the Jiangli Site, Suzhou, East China. *PLoS ONE* 9(1): e86816. doi:10.1371/journal.pone.0086816

**Citation:** The *PLOS ONE* Staff (2014) Correction: Pollen and Phytolith Evidence for Rice Cultivation and Vegetation Change during the Mid-Late Holocene at the Jiangli Site, Suzhou, East China. *PLoS ONE* 9(5): e97541. doi:10.1371/journal.pone.0097541

**Published:** May 6, 2014

**Copyright:** © 2014 The *PLOS ONE* Staff. This is an open-access article distributed under the terms of the Creative Commons Attribution License, which permits unrestricted use, distribution, and reproduction in any medium, provided the original author and source are credited.
